# Supplementary material
Source: PubMed Central journal article supplement (PMC4892185)
Supplement: ac5b04170_si_001.pdf [file ac5b04170_si_001.pdf]

## Supporting Information

# Biostable L-DNAzyme for Sensing of Metal Ions in Biological Systems

*Liang Cui<sup>1</sup>, Ruizi Peng<sup>1</sup>, Ting Fu<sup>1</sup>, Xiaobing Zhang<sup>1\*</sup>, Cuichen Wu<sup>1,3</sup>, Huapei Chen<sup>1</sup>,*

*Hao Liang<sup>1</sup>, Chaoyong James Yang<sup>2</sup> and Weihong Tan<sup>1,3\*</sup>*

<sup>1</sup>Molecular Science and Biomedicine Laboratory, State Key Laboratory of Chemo/Bio-Sensing and Chemometrics, College of Chemistry and Chemical Engineering, College of Biology, Collaborative Innovation Center for Chemistry and Molecular Medicine, Hunan University, Changsha 410082, China.

<sup>2</sup>State Key Laboratory of Physical Chemistry of Solid Surfaces, Key Laboratory for Chemical Biology of Fujian Province, The MOE Key Laboratory of Spectrochemical Analysis & Instrumentation, Department of Chemical Biology, College of Chemistry and Chemical Engineering, Xiamen University, Xiamen 361005, P. R. China

<sup>3</sup>Department of Chemistry and Physiology and Functional Genomics, Center for Research at the Bio/Nano Interface, Shands Cancer Center, University of Florida, Gainesville, FL 32611-7200, USA

To whom correspondence should be addressed. E-mail:  
[tan@chem.ufl.edu](mailto:tan@chem.ufl.edu), [xbzhang@hnu.edu.cn](mailto:xbzhang@hnu.edu.cn)

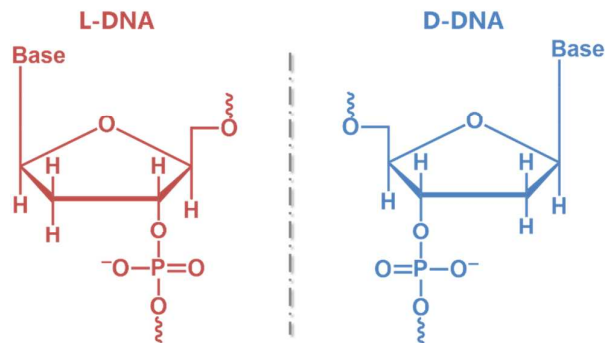

**Figure S1.** Mirror structure of L-DNA (left) and D-DNA (right).

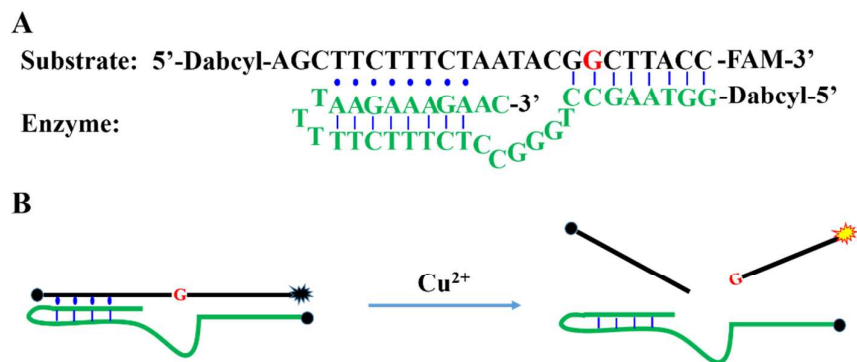

**Figure S2.** (A) Sequence of  $\text{Cu}^{2+}$ -dependent DNAzyme. (B) The substrate was labeled with a FAM fluorophore at the 3'-end and a quencher at the 5'-end, while the enzyme contained a 5'-quencher. This dual-quencher approach was employed to efficiently suppress background signals. Initially, the FAM emission was quenched by the nearby quenchers. In the presence of  $\text{Cu}^{2+}$ , the substrate was irreversibly cleaved at the cleavage site, leading to an increased fluorescence signal.

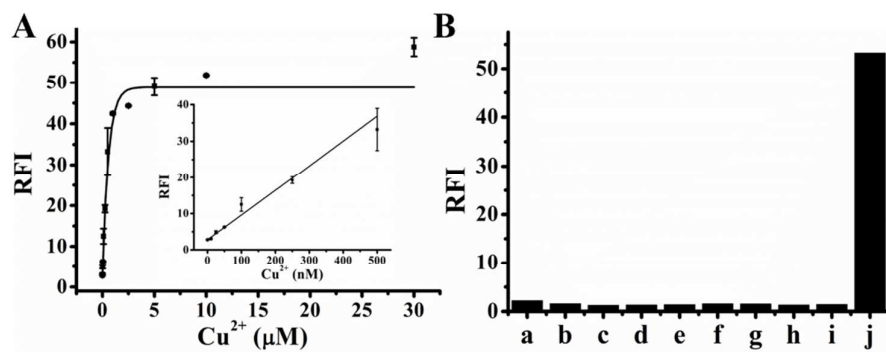

**Figure S3.** Response of  $\text{Cu}^{2+}$ -dependent L-DNAzyme to different concentrations (0, 0.01, 0.025, 0.05, 0.1, 0.25, 0.5, 1, 2.5, 5, 10 and 30  $\mu\text{M}$ ) of  $\text{Cu}^{2+}$  (A) and the control metal ions (B) a-j: blank,  $\text{Cd}^{2+}$ ,  $\text{Co}^{2+}$ ,  $\text{Fe}^{3+}$ ,  $\text{Mg}^{2+}$ ,  $\text{Mn}^{2+}$ ,  $\text{Ni}^{2+}$ ,  $\text{Pb}^{2+}$ ,  $\text{Zn}^{2+}$  and  $\text{Cu}^{2+}$ . RFI = relative fluorescence intensity. While the  $[\text{Cu}^{2+}] = 30 \mu\text{M}$ , the other metal ions  $[\text{M}^{n+}] = 300 \mu\text{M}$ .

## Cu<sup>2+</sup>-dependent DNAzyme

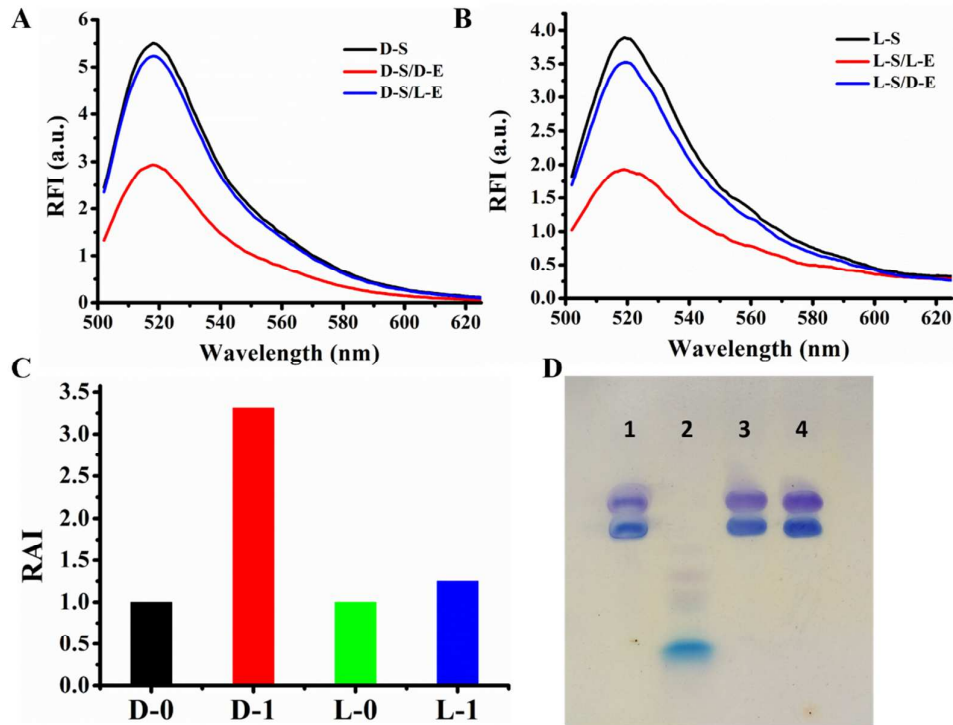

**Figure S4.** (A) Fluorescence spectra of Cu<sup>2+</sup>-dependent D-S, D-S/D-E, and D-S/L-E. (B) Fluorescence spectra of Cu<sup>2+</sup>-dependent L-S, L-S/L-E, and L-S/D-E. (C) Response of Cu<sup>2+</sup>-dependent D-S and L-S to SSB using fluorescence anisotropy. While D-S exhibited a 3.5-fold enhancement in anisotropy signal in the presence of SSB, L-S did not induce any change. RAI = relative anisotropy intensity; D0/D1, D-substrate in the absence (0) or presence (1) of SSB; L0/L1, L-substrate in the absence (0) or presence (1) of SSB. (D) Denaturing PAGE of the Cu<sup>2+</sup>-dependent L/D-DNAzyme in the absence or presence of DNase I. D-DNAzyme without (Lane 1) or with (Lane 2) DNase I; L-DNAzyme without (Lane 3) or with (Lane 4) DNase I.

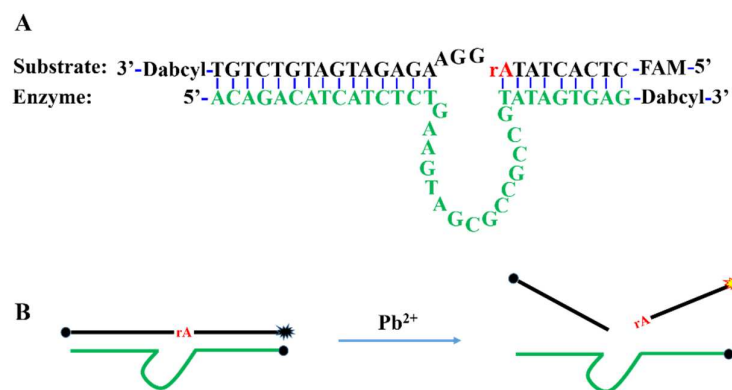

**Figure S5.** (A) Sequence of  $\text{Pb}^{2+}$ -dependent DNAzyme. (B) The working principle agrees with that of  $\text{Cu}^{2+}$ -dependent DNAzyme, as described in Figure S2B. In the presence of  $\text{Pb}^{2+}$ , the substrate was irreversibly cleaved at the cleavage site, leading to an increasing fluorescence signal.

## Pb<sup>2+</sup>-dependent DNzyme

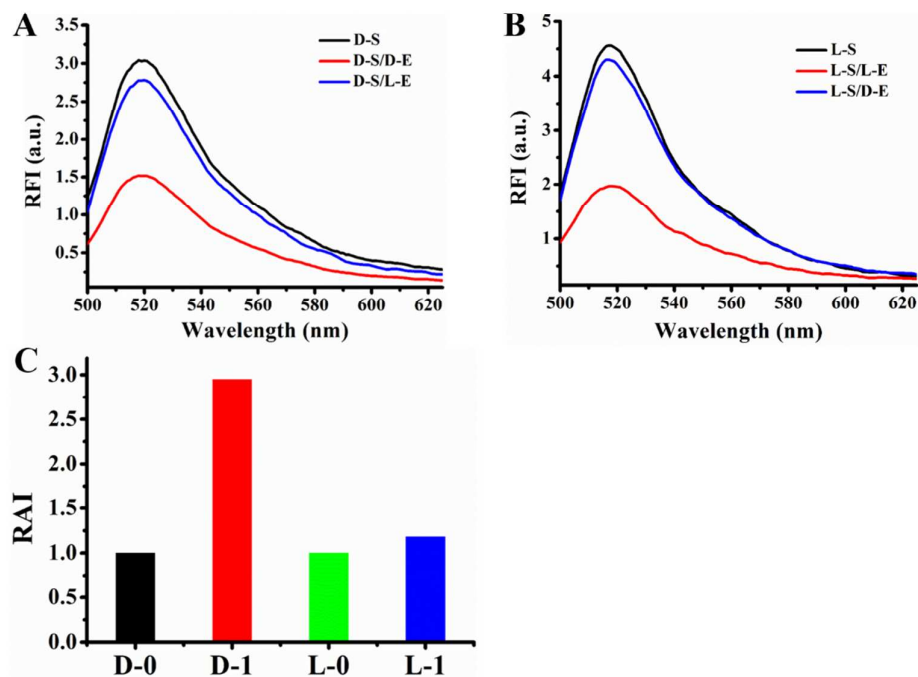

**Figure S6.** (A) Fluorescence spectra of Pb<sup>2+</sup>-dependent D-S, D-S/D-E, and D-S/L-E. (B) Fluorescence spectra of Pb<sup>2+</sup>-dependent L-S, L-S/L-E, and L-S/D-E. (C) Response of Pb<sup>2+</sup>-dependent D-S and L-S to SSB using fluorescence anisotropy. While D-S exhibited a 3-fold enhancement in anisotropy signal in the presence of SSB, L-S did not induce any change. D0/D1, D-substrate in the absence (0) or presence (1) of SSB; L0/L1, L-substrate in the absence (0) or presence (1) of SSB.
